# Supplementary material for: Reactive Case Detection for Plasmodium vivax Malaria Elimination in Rural Amazonia
Source: PubMed Central journal article supplement (PMC5179126; doi:10.1371/journal.pntd.0005221), 2016-12-12
Supplement: pntd.0005221.s004.pdf [file pntd.0005221.s004.pdf]

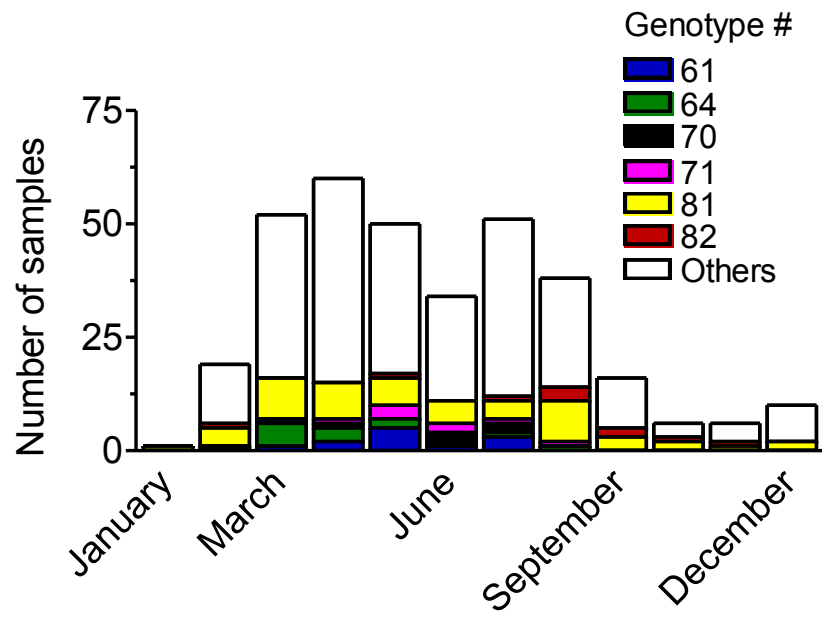

**Figure S3.** Temporal distribution of the six most common *Plasmodium vivax* multilocus genotypes (that together accounted for 30.1% of all local infections) in study localities in Acrelândia, Brazil, 2013.
