# Supplementary material for: Reactive Case Detection for Plasmodium vivax Malaria Elimination in Rural Amazonia
Source: PubMed Central journal article supplement (PMC5179126; doi:10.1371/journal.pntd.0005221), 2016-12-12
Supplement: pntd.0005221.s005.pdf [file pntd.0005221.s005.pdf]

**Table S1.** Multilocus genotypes in consecutive *Plasmodium vivax* infections diagnosed in 54 study subjects during reactive case detection (RCD) rounds (days [d] 0, 30, 60, and 180) in Acrelândia, Brazil, 2013.

| Cluster | Subject | RCD round | Month    | <i>m</i> sp1 <i>F</i> 3 |     | <i>pv</i> 3.27 |     | <i>MS</i> 16 |     | Comparison within group<br>(most plausible interpretation)                                                  |
|---------|---------|-----------|----------|-------------------------|-----|----------------|-----|--------------|-----|-------------------------------------------------------------------------------------------------------------|
|         |         |           |          | A1                      | A2  | A1             | A2  | A1           | A2  |                                                                                                             |
| 1       | 1       | d0*       | January  | 205                     |     | 216            |     | 255          |     | Different genotypes                                                                                         |
|         |         | d60*      | April    | 190                     |     | 204            | 208 | 276          | 189 |                                                                                                             |
|         | 14      | d60*      | April    | 190                     |     | 220            |     | 276          | 156 | Different genotypes                                                                                         |
|         |         | d180      | August   | 190                     |     | 208            |     | 276          |     |                                                                                                             |
| 2       | 30      | d0*       | February | 208                     |     | 300            |     | 300          | 174 | Different genotypes                                                                                         |
|         |         | d180      | August   | 205                     |     | 208            | 300 | 300          |     |                                                                                                             |
| 3       | 34      | d0*       | February | 235                     | 190 | 208            |     | 276          |     | Different genotypes                                                                                         |
|         |         | d60       | April    | 205                     | 151 | 204            | 152 | 126          |     |                                                                                                             |
|         | 36      | d0        | February | 205                     |     | 216            |     | 255          |     | Identical genotypes on d0 and d30<br>(persisting untreated infection or<br>early relapse); different on d60 |
|         |         | d30       | March    | 205                     |     | 216            |     | 255          |     |                                                                                                             |
|         |         | d60*      | April    | 205                     |     | 220            |     | 255          |     |                                                                                                             |
|         | 47      | d60       | April    | 205                     | 250 | 216            |     | 171          | 255 | Different genotypes                                                                                         |
| d180    |         | August    | 205      | 151                     | 216 |                | 258 |              |     |                                                                                                             |
| 4       | 52      | d0*       | February | 205                     |     | 216            |     | 258          |     | Different genotypes                                                                                         |
|         |         | d60*      | April    | 205                     |     | 216            | 228 | 255          |     |                                                                                                             |
|         |         | d180*     | August   | 106                     | 205 | 208            |     | 255          |     |                                                                                                             |
|         | 53      | d60       | April    | 205                     | 271 | 228            | 216 | 198          | 252 | Different genotypes                                                                                         |
|         |         | d180      | August   | 106                     | 217 | 208            |     | 255          |     |                                                                                                             |
|         | 435     | d30       | March    | 208                     | 205 | 208            | 216 | 300          | 174 | Different genotypes                                                                                         |
| d60     |         | April     | 202      |                         | 208 |                | 189 | 276          |     |                                                                                                             |

|     |       |        |          |     |     |     |     |     |                     |                                                                       |                                                                       |
|-----|-------|--------|----------|-----|-----|-----|-----|-----|---------------------|-----------------------------------------------------------------------|-----------------------------------------------------------------------|
| 5   | 42    | d0*    | February | 205 | 202 | 208 | 220 | 255 |                     | Different genotypes                                                   |                                                                       |
|     |       | d180*  | August   | 205 |     | 216 |     | 255 |                     |                                                                       |                                                                       |
|     | 92    | d30*   | March    | 205 |     | 216 |     | 255 |                     |                                                                       | Identical genotypes on d30, 60, and d180 (recrudescences or relapses) |
|     |       | d60*   | April    | 250 | 205 | 216 |     | 255 |                     |                                                                       |                                                                       |
|     | 105   | d180*  | August   | 205 |     | 216 | 228 | 255 |                     | Identical genotypes (recrudescence or early relapse)                  |                                                                       |
|     |       | d30*   | March    | 205 |     | 216 |     | 255 |                     |                                                                       |                                                                       |
|     | 70    | d60*   | April    | 205 | 202 | 216 | 224 | 255 | 165                 |                                                                       |                                                                       |
|     |       | d30*   | March    | 205 |     | 216 | 204 | 255 |                     |                                                                       |                                                                       |
| 6   | 70    | d60*   | April    | 205 |     | 208 | 216 | 255 | 183                 | Identical genotypes on d30, 60, and d180 (recrudescences or relapses) |                                                                       |
|     |       | d180*  | August   | 205 |     | 216 |     | 255 |                     |                                                                       |                                                                       |
|     | 71    | d0*    | February | 226 | 151 | 208 | 216 | 297 | 300                 | Different genotypes                                                   |                                                                       |
|     |       | d30*   | March    | 205 |     | 216 |     | 234 |                     |                                                                       |                                                                       |
|     | d60*  | April  | 226      |     | 236 |     | 204 |     |                     |                                                                       |                                                                       |
|     | d60   | April  | 205      |     | 236 | 228 | 258 |     |                     |                                                                       |                                                                       |
| 72  | d180* | August | 202      |     | 224 | 216 | 258 |     | Different genotypes |                                                                       |                                                                       |
|     | d30   | March  | 205      |     | 216 |     | 174 |     |                     | 156                                                                   |                                                                       |
| 341 | d60*  | April  | 205      |     | 216 | 224 | 156 | 204 | Different genotypes |                                                                       |                                                                       |
|     | d60*  | April  | 205      | 226 | 220 |     | 255 |     |                     |                                                                       |                                                                       |
|     | 343   | d180*  | August   | 205 | 226 | 212 |     | 255 |                     | Different genotypes                                                   |                                                                       |
|     |       | d0*    | February | 202 | 247 | 216 |     | 174 |                     |                                                                       |                                                                       |
| 8   | 118   | d30*   | March    | 202 | 226 | 252 |     | 276 |                     | Different genotypes                                                   |                                                                       |
|     |       | d30*   | March    | 205 |     | 208 |     | 174 |                     |                                                                       |                                                                       |
|     | 214   | d60    | May      | 205 |     | 208 |     | 300 |                     | Different genotypes                                                   |                                                                       |
|     |       | d0*    | February | 202 |     | 208 |     | 276 |                     |                                                                       |                                                                       |
| 9   | 335   | d60*   | May      | 202 |     | 208 |     | 276 | 189                 | Identical genotypes (relapses)                                        |                                                                       |
|     |       | d180   | August   | 202 |     | 208 | 216 | 276 |                     |                                                                       |                                                                       |

|    |     |       |           |     |     |     |     |     |                                                                                                               |     |
|----|-----|-------|-----------|-----|-----|-----|-----|-----|---------------------------------------------------------------------------------------------------------------|-----|
| 10 | 334 | d60*  | May       | 205 | 226 | 256 | 216 | 255 | Different genotypes                                                                                           |     |
|    |     | d180* | September | 205 | 250 | 208 |     | 258 |                                                                                                               |     |
| 12 | 280 | d0*   | March     | 205 | 226 | 216 |     | 255 | Different genotypes                                                                                           |     |
|    |     | d30*  | April     | 205 |     | 252 |     | 228 |                                                                                                               |     |
|    | 281 | d0*   | March     | 205 | 229 | 216 |     | 255 | Identical genotypes (late relapse)                                                                            |     |
|    |     | d180  | September | 205 |     | 228 | 216 | 255 |                                                                                                               | 195 |
| 14 | 453 | d30   | April     | 205 | 226 | 216 | 204 | 255 | Identical genotypes on d30 and d180<br>(persisting untreated infection or late relapse), but different on d60 |     |
|    |     | d60   | May       | 205 |     | 220 |     | 255 |                                                                                                               |     |
|    |     | d180  | September | 205 |     | 204 |     | 255 |                                                                                                               |     |
| 15 | 323 | d60*  | June      | 202 | 199 | 208 |     | 276 | Different genotypes                                                                                           |     |
|    |     | 180*  | September | 202 |     | 208 | 216 | 255 |                                                                                                               |     |
|    | 328 | d30*  | April     | 202 | 205 | 204 |     | 273 | Different genotypes                                                                                           |     |
|    |     | d60*  | May       | 208 | 205 | 208 | 216 | 276 |                                                                                                               | 126 |
|    | 330 | d180  | September | 217 |     | 248 |     | 303 | 207                                                                                                           |     |
|    |     | d30*  | April     | 205 |     | 280 | 204 | 174 |                                                                                                               |     |
|    | 331 | d60*  | May       | 202 |     | 208 |     | 189 | Different genotypes                                                                                           |     |
|    |     | d30*  | April     | 205 |     | 220 |     | 255 |                                                                                                               |     |
|    | 331 | d60*  | May       | 202 | 247 | 220 |     | 255 | Different genotypes                                                                                           |     |
|    |     | d180* | September | 220 |     | 252 |     | 207 |                                                                                                               | 303 |
|    |     | d0*   | April     | 205 | 211 | 208 | 216 | 126 |                                                                                                               | 111 |
| 18 | 88  | d60*  | June      | 211 | 208 | 216 |     | 156 | Different genotypes                                                                                           |     |
|    |     | d0*   | April     | 205 |     | 216 |     | 255 |                                                                                                               |     |
| 19 | 547 | d30*  | May       | 205 |     | 320 | 232 | 255 | Different genotypes                                                                                           |     |
|    |     | d0*   | April     | 205 |     | 216 |     | 255 |                                                                                                               |     |
| 20 | 565 | d0*   | April     | 205 |     | 216 |     | 255 | Different genotypes                                                                                           |     |
|    |     | d30*  | May       | 109 | 130 | 208 | 216 | 129 |                                                                                                               |     |
|    |     | d60*  | June      | 211 |     | 204 | 252 | 123 |                                                                                                               |     |

|    |      |       |          |     |     |     |     |     |                                                                      |
|----|------|-------|----------|-----|-----|-----|-----|-----|----------------------------------------------------------------------|
|    |      | d180* | October  | 205 | 151 | 200 | 300 |     |                                                                      |
| 21 | 625  | d0*   | April    | 202 |     | 208 | 303 |     | Different genotypes                                                  |
|    |      | d30*  | May      | 217 |     | 276 | 174 |     |                                                                      |
| 23 | 737  | d0    | May      | 205 |     | 216 | 255 |     | Identical genotypes (persisting untreated infection or late relapse) |
|    |      | d180  | November | 205 |     | 216 | 208 | 255 |                                                                      |
|    | 748  | d0    | May      | 205 | 202 | 216 | 255 |     | Different genotypes                                                  |
|    |      | d180  | November | 205 | 151 | 208 | 212 | 204 |                                                                      |
| 24 | 800  | d0*   | May      | 205 | 226 | 216 | 255 |     | Different genotypes                                                  |
|    |      | d180  | November | 205 |     | 216 | 258 |     |                                                                      |
| 26 | 841  | d0    | May      | 202 |     | 208 | 243 |     | Different genotypes                                                  |
|    |      | d30   | June     | 202 |     | 212 | 276 |     |                                                                      |
| 27 | 857  | d0    | May      | 205 |     | 216 | 255 | 183 | Identical genotypes (persisting untreated infection or relapse)      |
|    |      | d60*  | July     | 205 |     | 216 | 228 | 255 | 198                                                                  |
|    | 1393 | d30   | June     | 106 | 124 | 208 | 129 |     | Different genotypes                                                  |
|    |      | d180* | November | 205 |     | 228 | 216 | 255 |                                                                      |
|    | 1398 | d30   | June     | 205 | 151 | 204 | 252 | 126 | Different genotypes                                                  |
|    |      | d60   | July     | 205 |     | 216 | 255 |     |                                                                      |
| 28 | 93   | d0*   | May      | 205 |     | 220 | 255 | 183 | Different genotypes                                                  |
|    |      | d60   | July     | 205 |     | 216 | 255 |     |                                                                      |
| 30 | 868  | d0*   | May      | 205 |     | 216 | 255 |     | Identical genotypes (relapse)                                        |
|    |      | d60   | August   | 205 |     | 216 | 208 | 255 | 123                                                                  |
|    | 869  | d30*  | July     | 205 | 202 | 204 | 216 | 255 | Identical genotypes (recrudescence or late relapse)                  |
|    |      | d60*  | August   | 205 |     | 216 | 255 |     |                                                                      |
|    |      | d180* | December | 205 |     | 216 | 255 |     |                                                                      |
|    | 921  | d0    | May      | 217 |     | 216 | 174 |     | Different genotypes                                                  |
|    |      | d180  | December | 106 |     | 208 | 192 | 204 |                                                                      |

|    |      |      |           |     |     |     |     |     |                     |                                                      |
|----|------|------|-----------|-----|-----|-----|-----|-----|---------------------|------------------------------------------------------|
|    | 1539 | d30  | July      | 205 | 252 | 276 |     |     | Different genotypes |                                                      |
|    |      | d60  | August    | 205 | 190 | 204 | 123 |     |                     |                                                      |
| 31 | 878  | d0*  | May       | 217 |     | 228 | 264 | 156 | Different genotypes |                                                      |
|    |      | d30* | July      | 106 | 124 | 208 | 129 |     |                     |                                                      |
|    | 881  | d30* | July      | 226 | 205 | 204 | 226 | 303 | Different genotypes |                                                      |
|    |      | d60* | August    | 202 | 256 | 208 | 207 | 303 |                     |                                                      |
|    | 884  | d60* | August    | 202 |     | 208 | 207 | 201 | Different genotypes |                                                      |
|    |      | d180 | December  | 202 |     | 208 | 303 |     |                     |                                                      |
| 34 | 2004 | d0*  | June      | 205 |     | 216 | 204 | 255 | 216                 | Different genotypes                                  |
|    |      | d60* | August    | 199 |     | 228 |     | 255 |                     |                                                      |
| 35 | 1025 | d0   | June      | 202 |     | 208 |     | 303 | Different genotypes |                                                      |
|    |      | d30  | July      | 205 |     | 216 |     | 276 |                     |                                                      |
| 36 | 1098 | d0*  | June      | 205 |     | 216 | 204 | 255 | Different genotypes |                                                      |
|    |      | d30  | July      | 190 | 211 | 208 |     | 276 |                     |                                                      |
| 38 | 1261 | d0*  | July      | 235 | 190 | 208 | 188 | 276 | Different genotypes |                                                      |
|    |      | d30* | August    | 205 | 202 | 208 | 216 | 276 |                     |                                                      |
| 39 | 1309 | d0*  | July      | 208 | 229 | 228 | 208 | 177 | 183                 | Different genotypes                                  |
|    |      | d30  | August    | 205 |     | 208 |     | 174 |                     |                                                      |
| 40 | 1350 | d0*  | July      | 205 |     | 216 |     | 255 | 183                 | Identical genotypes (relapse)                        |
|    |      | d60  | September | 205 |     | 216 |     | 255 | 213                 |                                                      |
| 41 | 1561 | d0*  | July      | 202 |     | 208 | 204 | 273 | 228                 | Identical genotypes (recrudescence or early relapse) |
|    |      | d30* | August    | 202 | 226 | 204 | 226 | 273 | 228                 |                                                      |

Notes: A1 and A2 denote, respectively, the sizes (in base pairs) of the major (most abundant) and minor allele (if any) at a given locus. Identical alleles (either major or minor) in consecutive samples from the same patient are highlighted. Asterisks (RCD round column) indicate infections treated with a standard regimen of chloroquine and primaquine. By defining a pair of genotypes as “different” we mean no allele sharing was found at any locus, considering both A1 and A2.
